# Supplementary material for: Discovery of New Cyclic Lipodepsipeptide Orfamide N via Partnership with Middle School Students from the Boys and Girls Club
Source: PubMed Central journal article supplement — ACS Omega. 2024 Oct 24;9(44):44749–59. doi: 10.1021/acsomega.4c07459 (PMC11541793; doi:10.1021/acsomega.4c07459), 2024-10-24
Supplement: ao4c07459_si_001.pdf [file ao4c07459_si_001.pdf]

SUPPORTING INFORMATION: DISCOVERY OF NEW CYCLIC LIPODEPSIPEPTIDE ORFAMIDE  
N VIA PARTNERSHIP WITH MIDDLE SCHOOL STUDENTS FROM THE BOYS & GIRLS CLUB

Jin Yi Tan<sup>1</sup>, Mario Augustinović<sup>1</sup>, Ashraf M. Omar<sup>2</sup>, Vitor B. Lourenzon<sup>1</sup>, Nyssa Krull<sup>1</sup>, Xochitl Lopez<sup>1</sup>,  
Manead Khin<sup>1</sup>, Gauri Shetye<sup>3</sup>, Duc Nguyen<sup>3</sup>, Mallique Qader<sup>3</sup>, Angela C. Nugent<sup>3</sup>, Enock Mpofo<sup>3</sup>,  
Camarria Williams<sup>4</sup>, Jonathon Rodriguez<sup>4</sup>, Joanna E. Burdette<sup>1</sup>, Sanghyun Cho<sup>1,3</sup>, Scott G.  
Franzblau<sup>1,3</sup>, Alessandra S. Eustáquio<sup>1</sup>, Qibin Zhang<sup>2</sup>, Brian T. Murphy<sup>1\*</sup>

<sup>1</sup>Department of Pharmaceutical Sciences: Center for Biomolecular Sciences: College of Pharmacy,  
University of Illinois at Chicago, IL 60612, United States

<sup>2</sup>Center for Translational Biomedical Research, University of North Carolina at Greensboro, NC 27412,  
United States

<sup>3</sup>Institute for Tuberculosis Research, College of Pharmacy, University of Illinois at Chicago, IL 60612,  
United States

<sup>4</sup>Boys and Girls Clubs of Chicago, IL, United States

\*Corresponding Author: BTM: Phone: (312) 413-9057; E-mail: btmurphy@uic.edu

## TABLE OF CONTENTS

**Figure S1.** Fractionation tree for isolate BCGFaB3.

**Figure S2.** Isolation of orfamide N (**1**), orfamide A (**2**), and orfamide M (**3**) via semi-preparative RP-HPLC.

**Figure S3.** Dereplication of orfamide cyclic lipodepsipeptide analogs via LCMS/MS / GNPS analysis.

**Figure S4.** HR-qTOF-MS/MS spectra of **2**.

**Figure S5.**  $^1\text{H}$  /  $^{13}\text{C}$  NMR (600 / 150 MHz,  $\text{d}_3\text{-MeOH}$ ) spectra of **2**.

**Figure S6.** Two-dimensional NMR (600 / 150 MHz,  $\text{d}_3\text{-MeOH}$ ) spectra of **2**.

**Figure S7.** HR-qTOF-MS/MS spectra of **3**.

**Figure S8.**  $^1\text{H}$  /  $^{13}\text{C}$  NMR (600 / 150 MHz,  $\text{d}_3\text{-MeOH}$ ) spectra of **3**.

**Figure S9.** HR-qTOF-MS/MS spectra of **1**.

**Figure S10.**  $^1\text{H}$  NMR (600,  $\text{d}_3\text{-MeOH}$ ) spectrum of **1**.

**Figure S11.**  $^{13}\text{C}$  NMR (150 MHz,  $\text{d}_3\text{-MeOH}$ ) spectrum of **1**.

**Figure S12.** COSY (600 MHz,  $\text{d}_3\text{-MeOH}$ ) spectrum of **1**.

**Figure S13.** TOCSY (600 MHz,  $\text{d}_3\text{-MeOH}$ ) spectrum of **1**.

**Figure S14.** HSQC (600 MHz,  $\text{d}_3\text{-MeOH}$ ) spectrum of **1**.

**Figure S15.** HMBC (600 MHz,  $\text{d}_3\text{-MeOH}$ ) spectrum of **1**.

**Figure S16.** ROESY (600 MHz,  $\text{d}_3\text{-MeOH}$ ) spectrum of **1**.

**Figure S17.** Whole genome phylogenetic analysis of isolate BCGFaB3.

**Figure S18.** A phylogenetic analysis of the C-domains in the orfamide N biosynthetic gene cluster.

**Figure S19.** Chiral HPLC analysis of isoleucine residues in **1**.

**Figure S20.** Advanced Marfey's analysis of **1**.

**Figure S21.** Chiral LC-MS analysis to determine the configuration of the  $\beta$ -hydroxy acid in **1**.

**Figure S22.** Antibacterial testing of **1** and **2**.

**Figure S1.** Fractionation tree for isolate BCGFaB3.

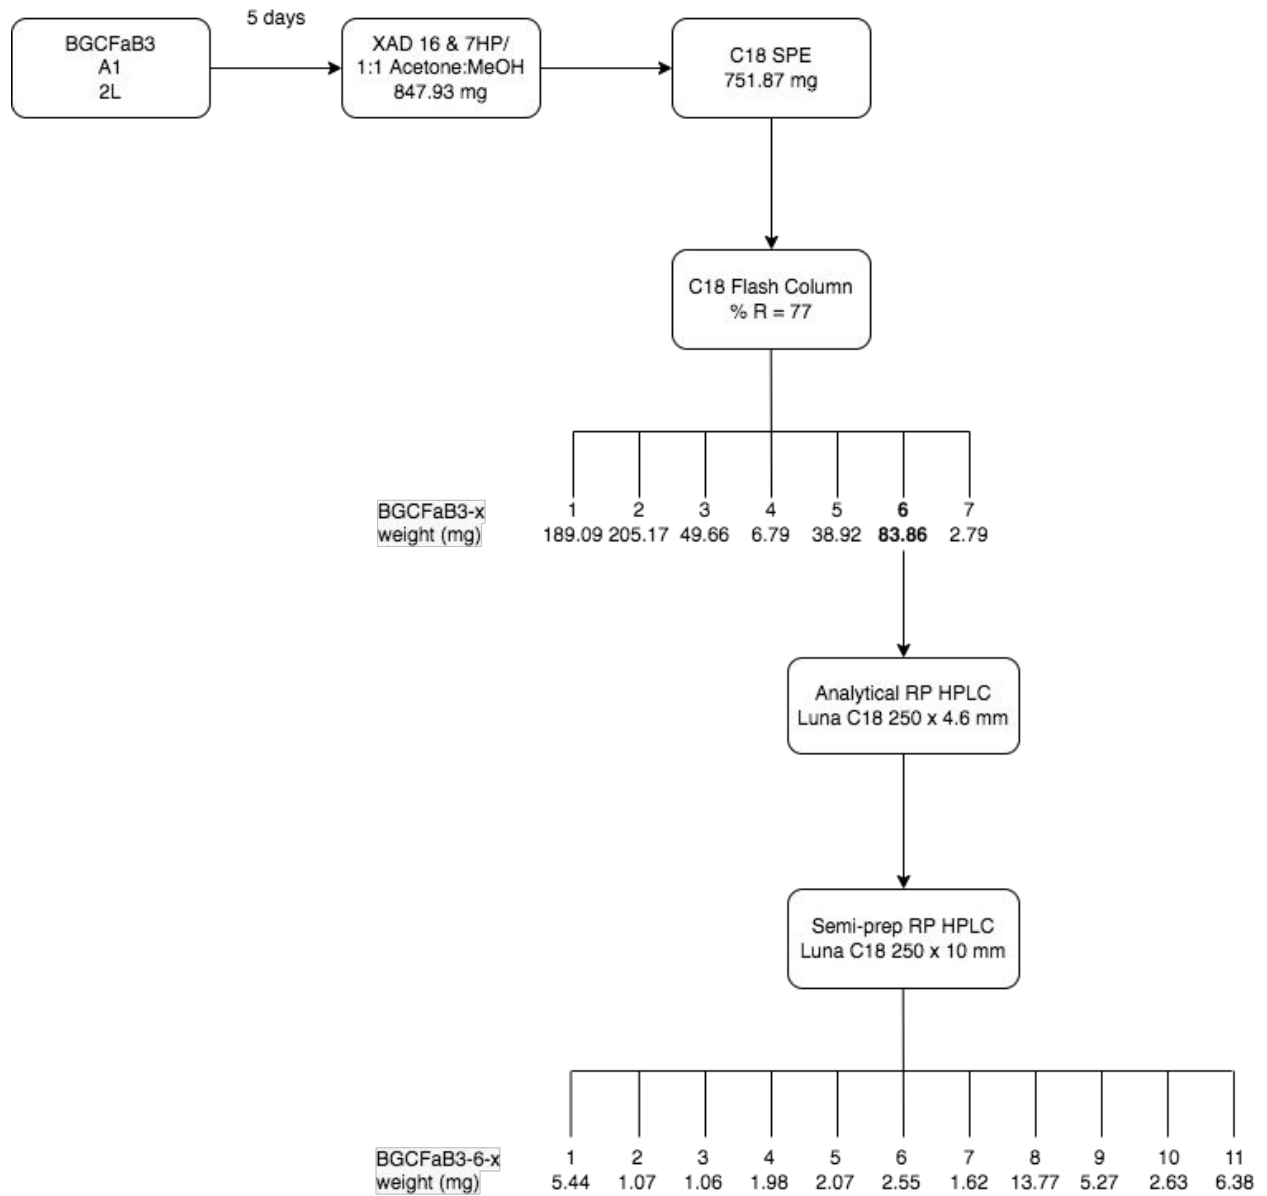

**Figure S2.** Isolation of orfamide N (1), orfamide A (2), and orfamide M (3) via semi-preparative RP-HPLC.

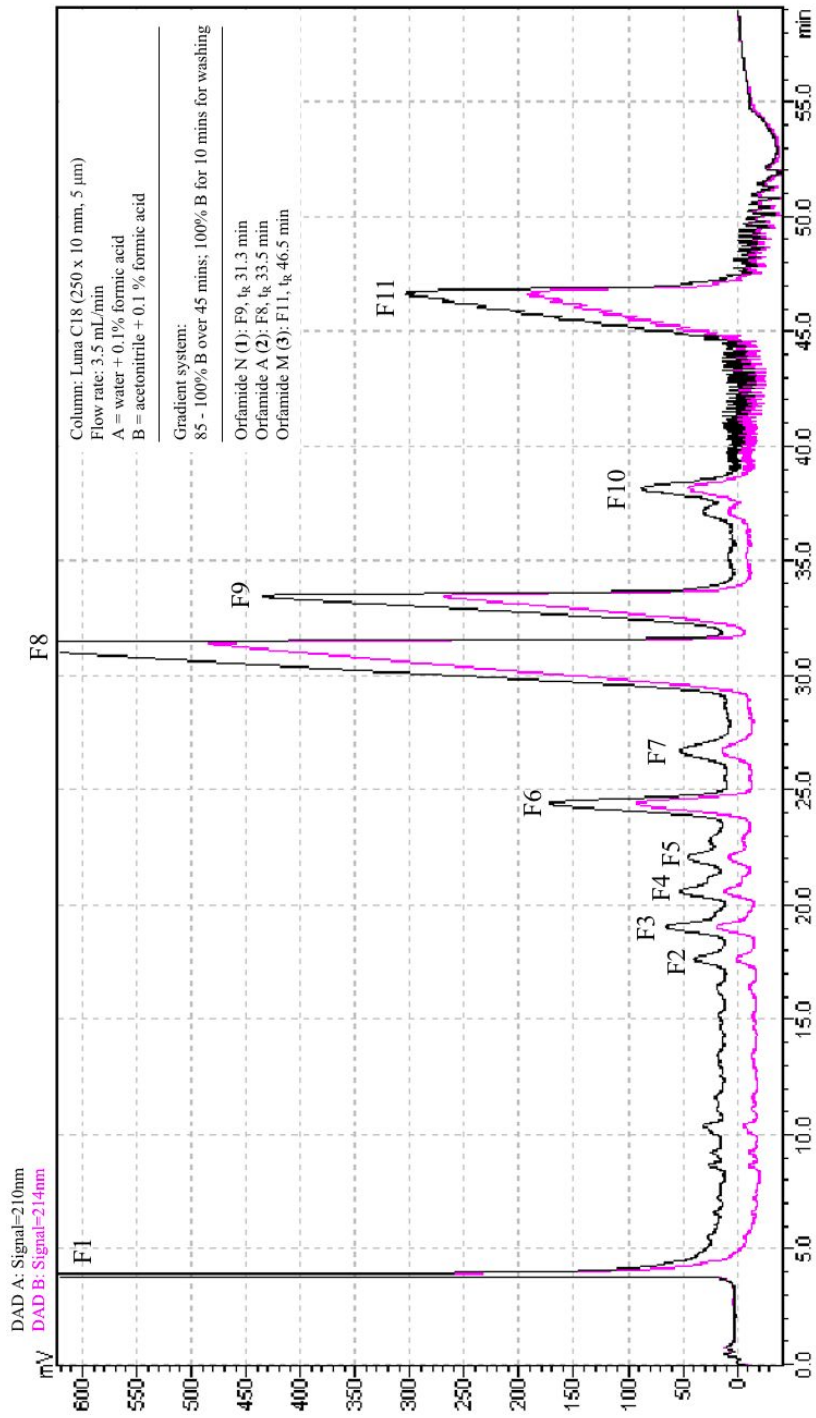

**Figure S3.** Dereplication of orfamide cyclic lipodepsipeptide analogs via LCMS/MS / GNPS analysis.

**Figure S3A.** Low-resolution MS/MS spectra of orfamide analogs from subfractions BGCFaB3-6-6 (orfamide B  $m/z$  1281.88  $[M+H]^+$ ), BGCFaB3-6-7 (orfamide F  $m/z$  1307.90  $[M+H]^+$ ), BGCFaB3-6-8 (orfamide A (**2**)  $m/z$  1295.90  $[M+H]^+$ ), BGCFaB3-6-9 (orfamide N (**1**)  $m/z$  1321.92  $[M+H]^+$ ), BGCFaB3-6-10 (orfamide G/H  $m/z$  1309.92  $[M+H]^+$ ), and BGCFaB3-6-11 (orfamide M (**3**)  $m/z$  1323.94  $[M+H]^+$ ).

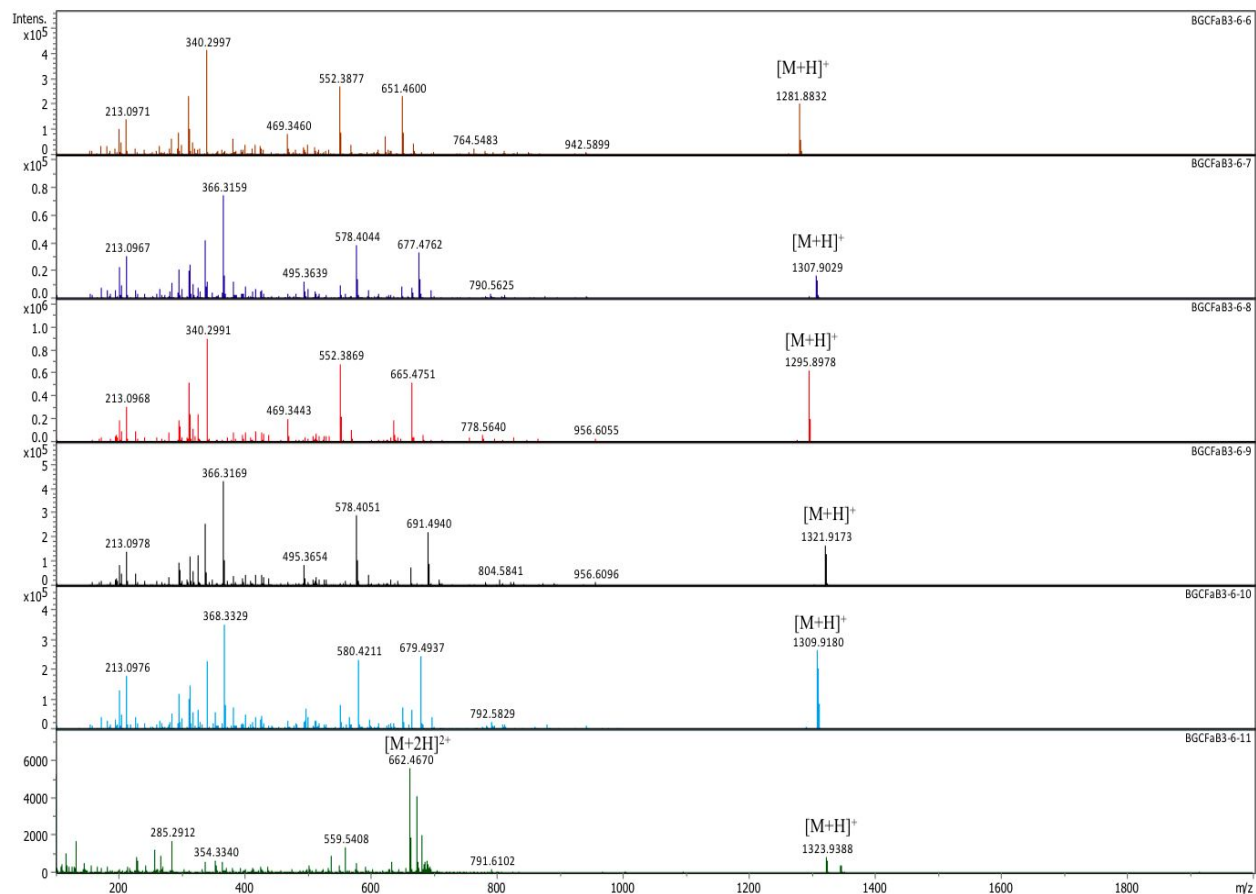

**Figure S3B.** GNPS analysis and molecular network for orfamide analogs in BGCFaB3-6.

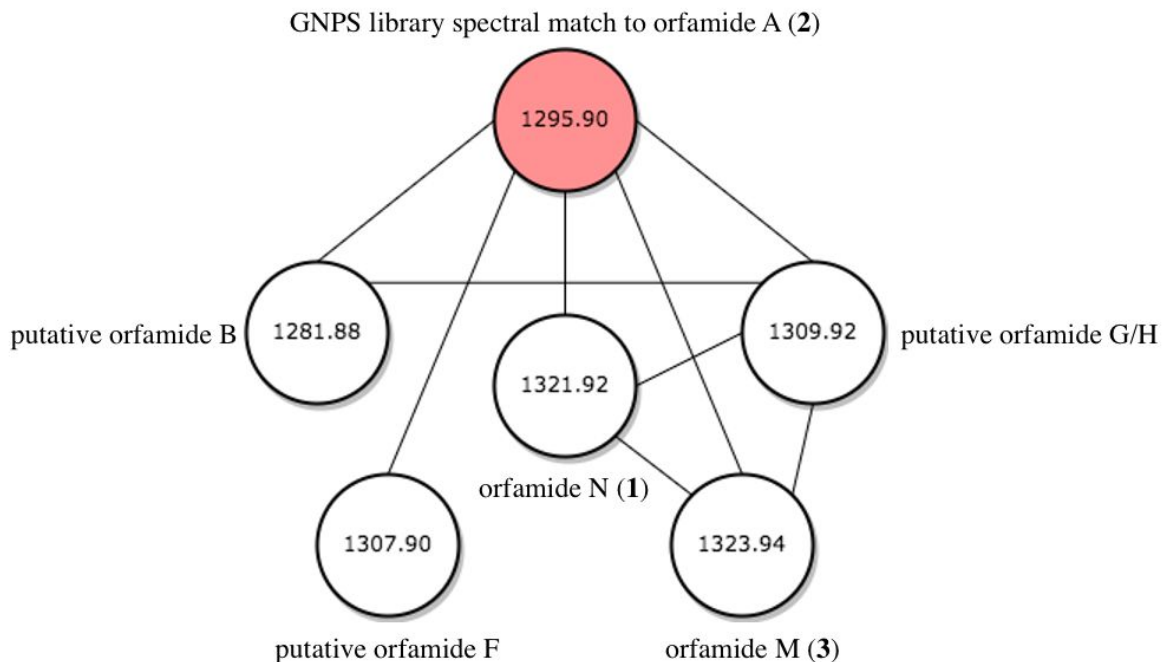

**GNPS parameters.**

Basic options: Precursor Ion Mass Tolerance, 2 Da; Fragment Ion Mass Tolerance, 0.5 Da

Advanced Network Options: Min Pairs Cos, 0.65; Network TopK, 10; Maximum Connected Component Size, 100; Minimum Matched Fragment Ions, 4; Minimum Cluster Size, 1

Advanced Library Search Options: Library Search Min Matched Peaks, 6; Score Threshold, 0.7; Maximum Analog Search Mass Difference, 100.0

Figure S4. HR-qTOF-MS/MS spectra of 2.

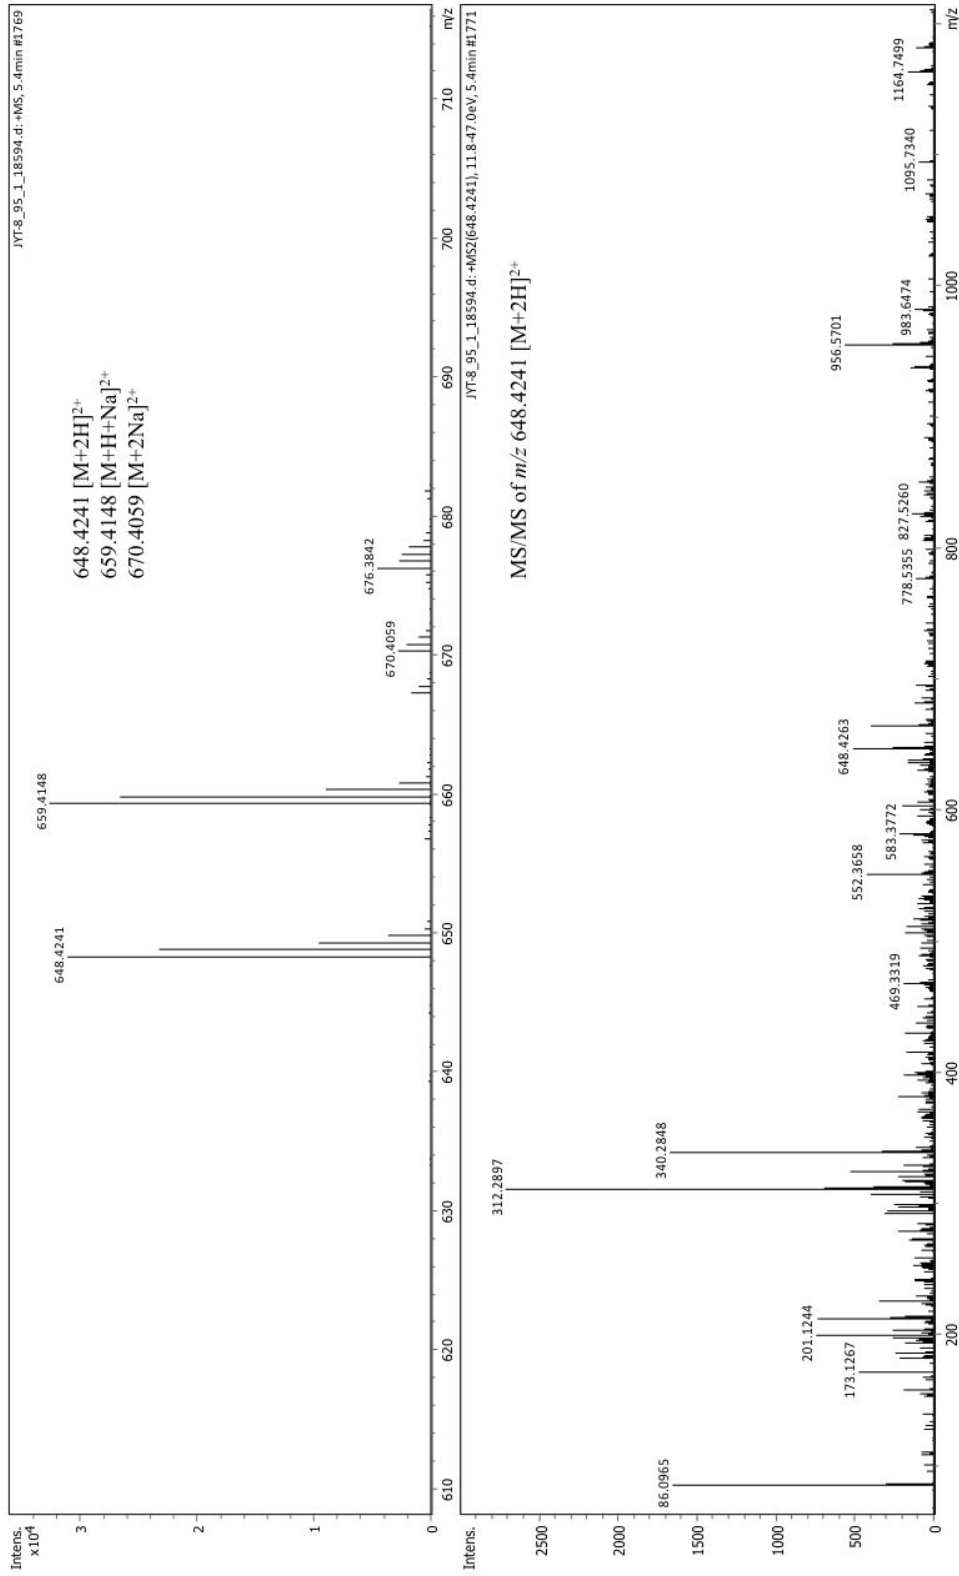

**Figure S5.**  $^1\text{H}$  /  $^{13}\text{C}$  NMR (600 / 150 MHz,  $d_3$ -MeOH) spectra of **2**.

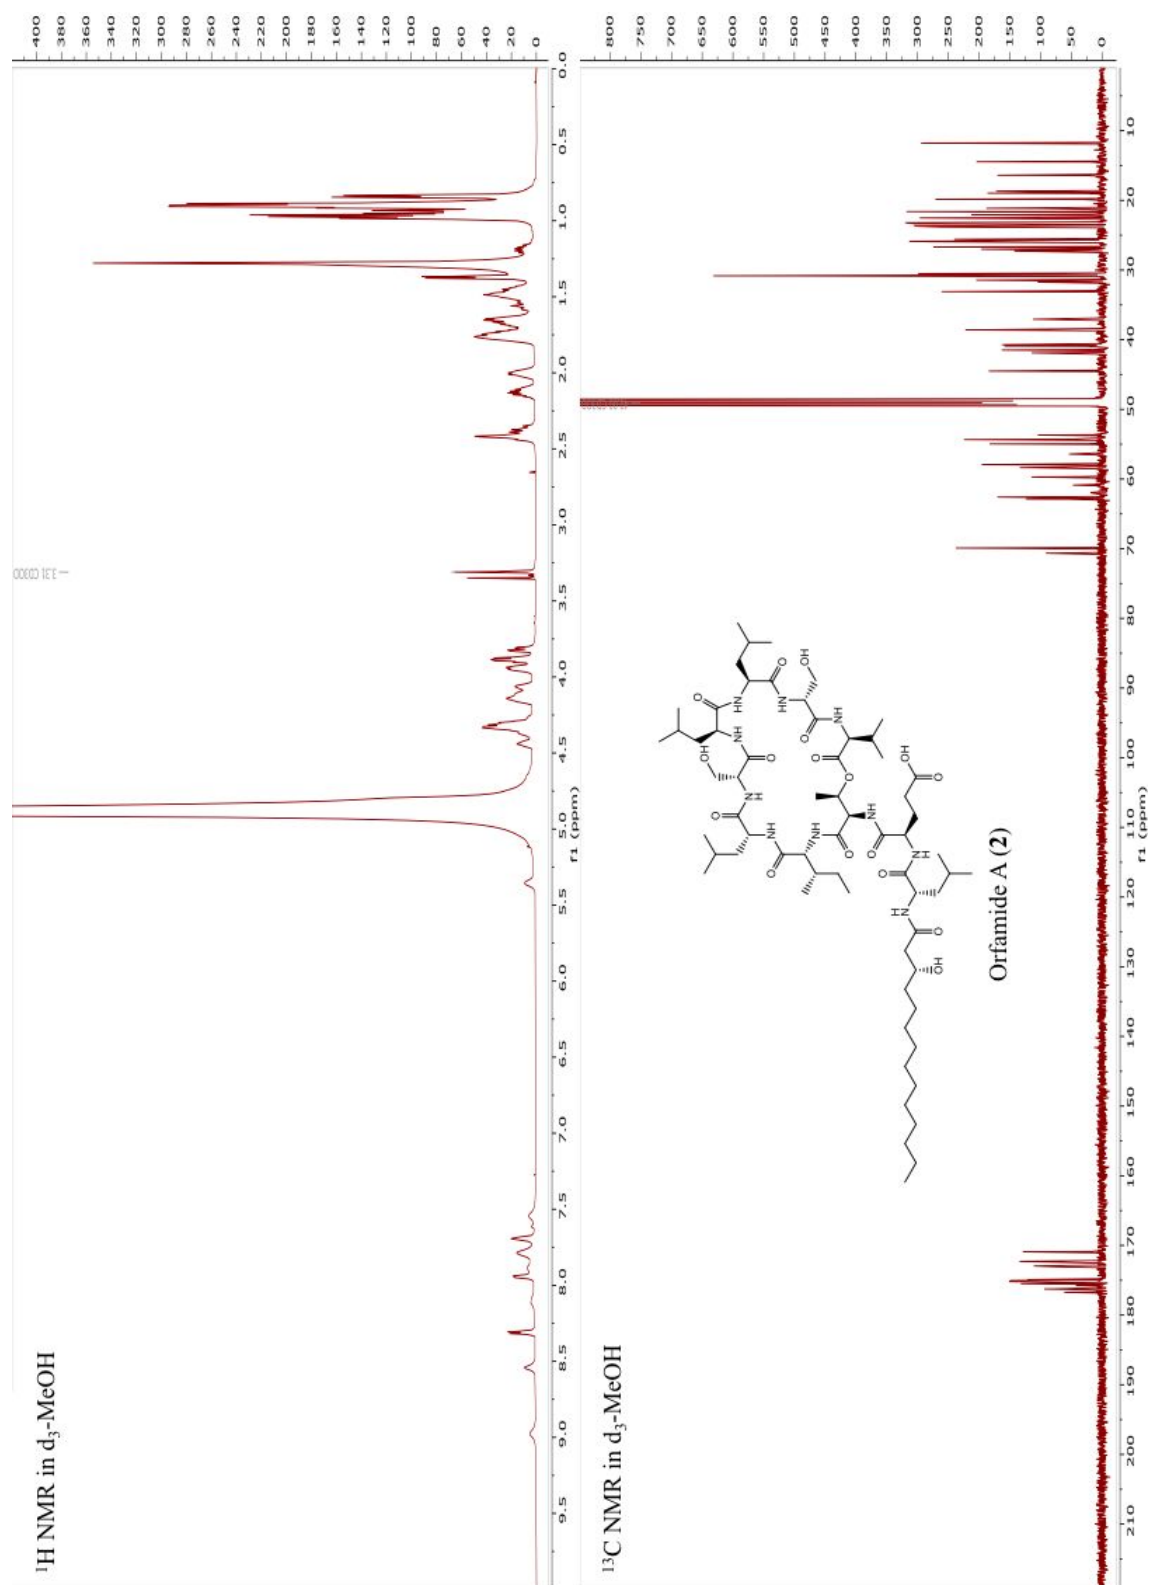



**Figure S6.** Two-dimensional NMR (600 / 150 MHz,  $d_3$ -MeOH) spectra of **2**.

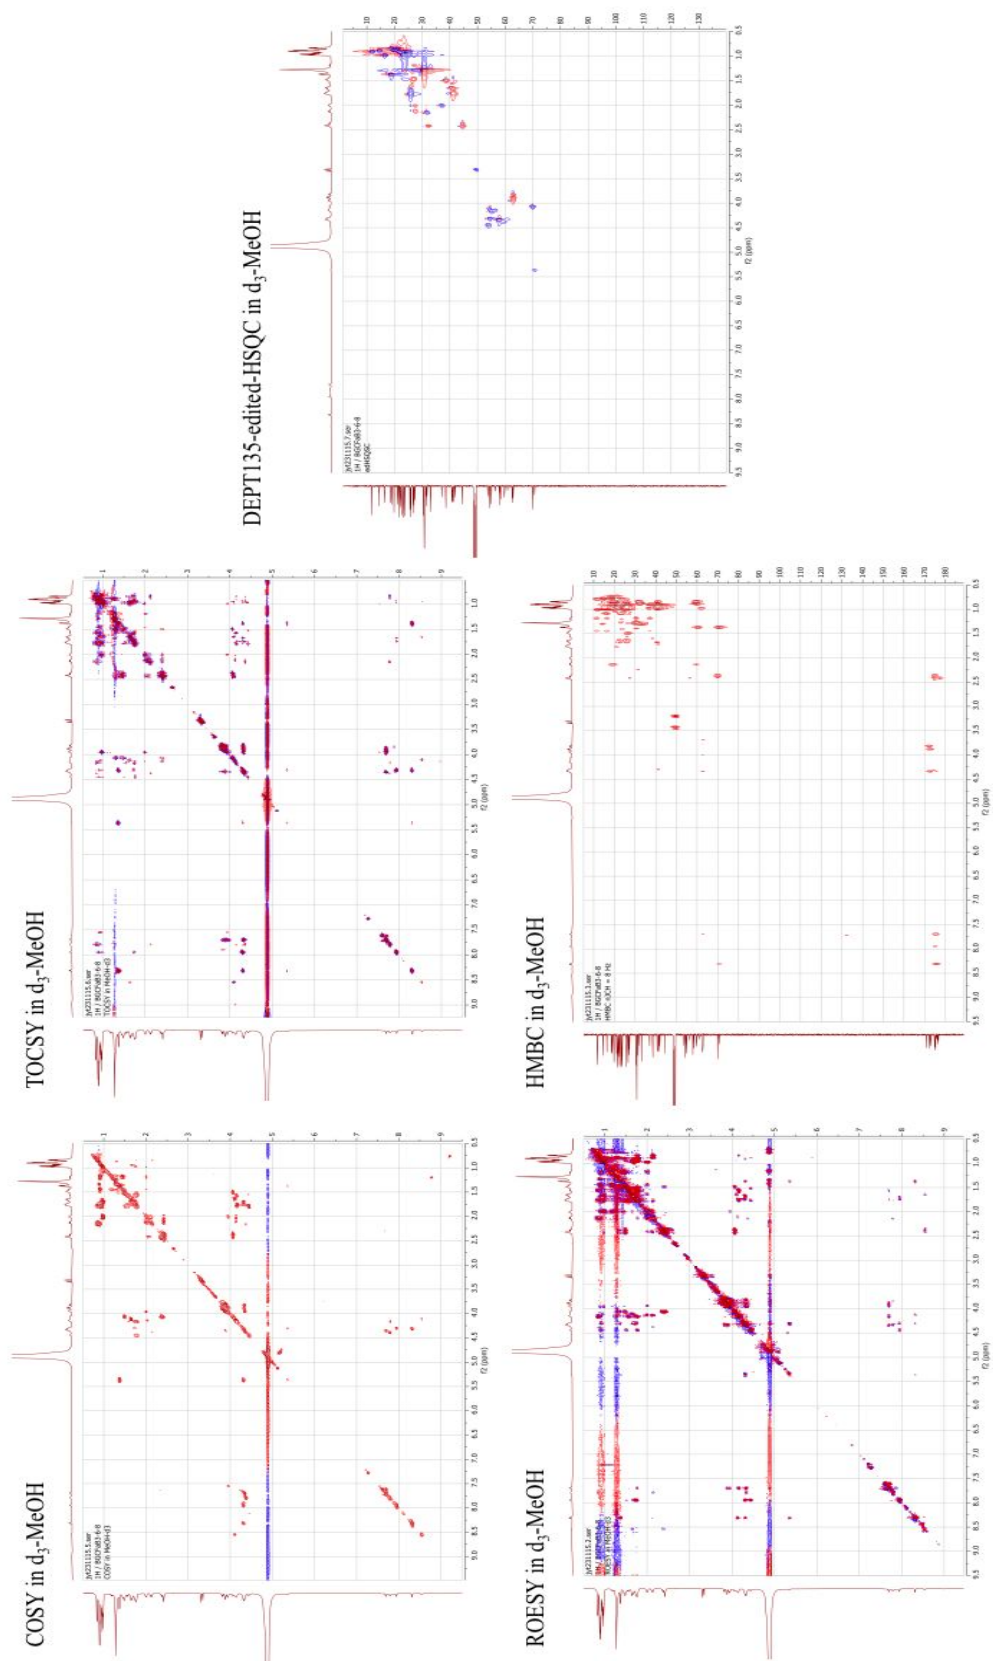

Figure S7. HR-qTOF-MS/MS spectra of **3**.

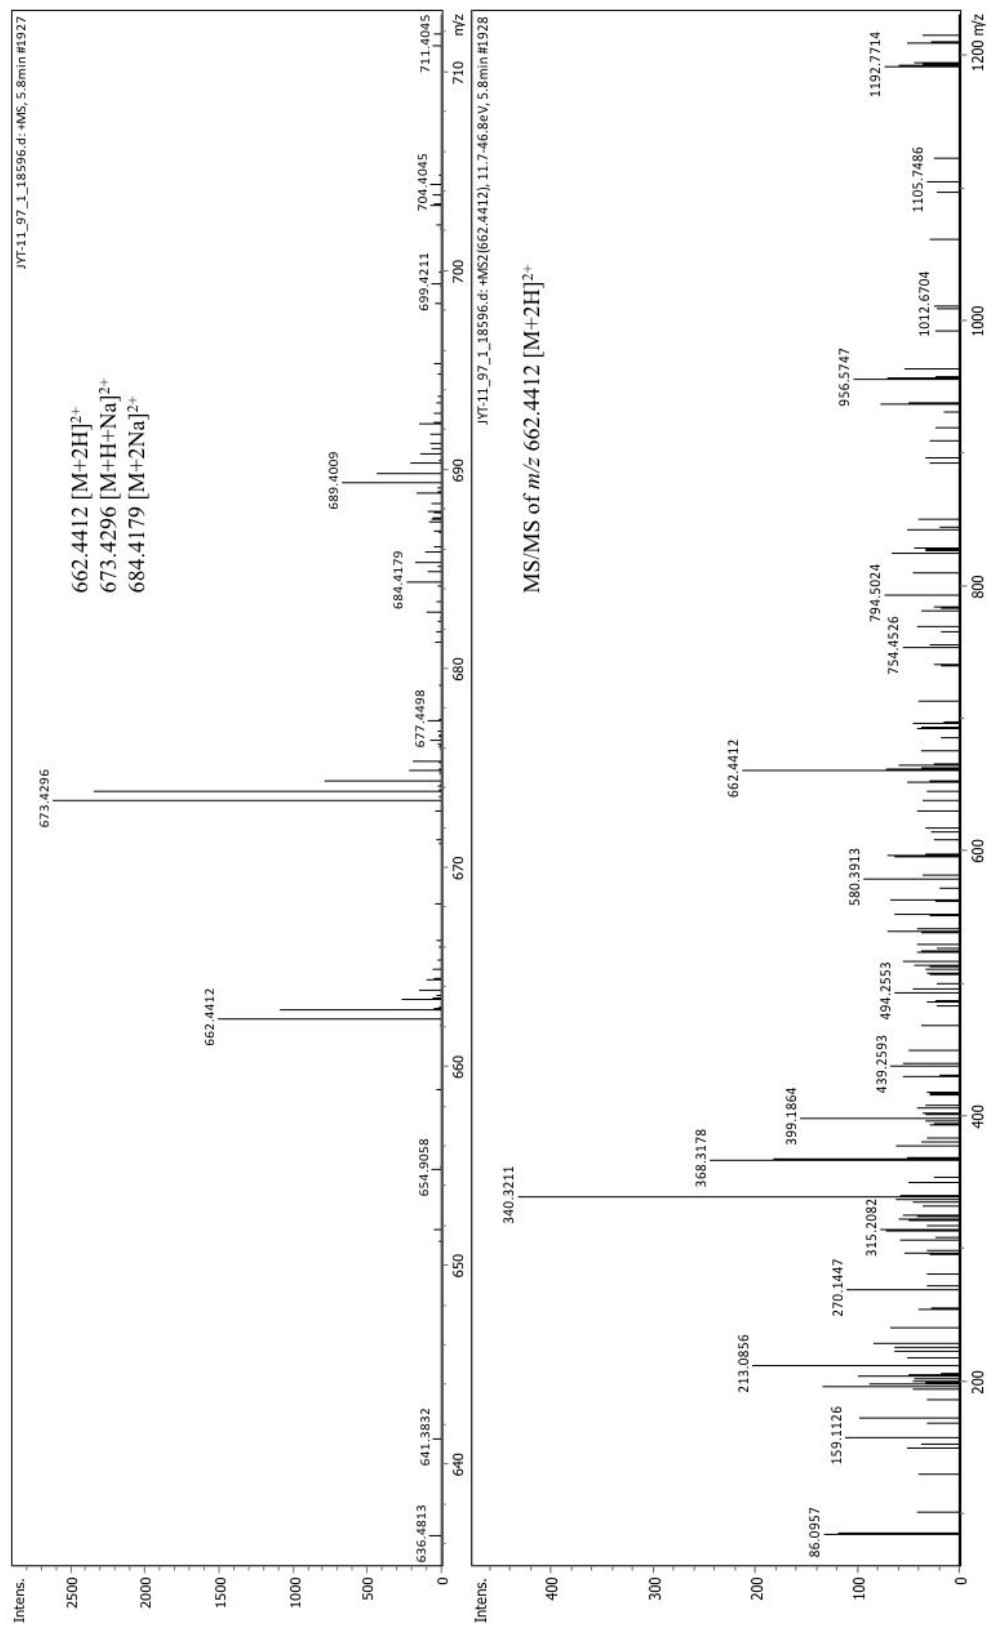



Figure S9. HR-qTOF-MS/MS spectra of **1**.

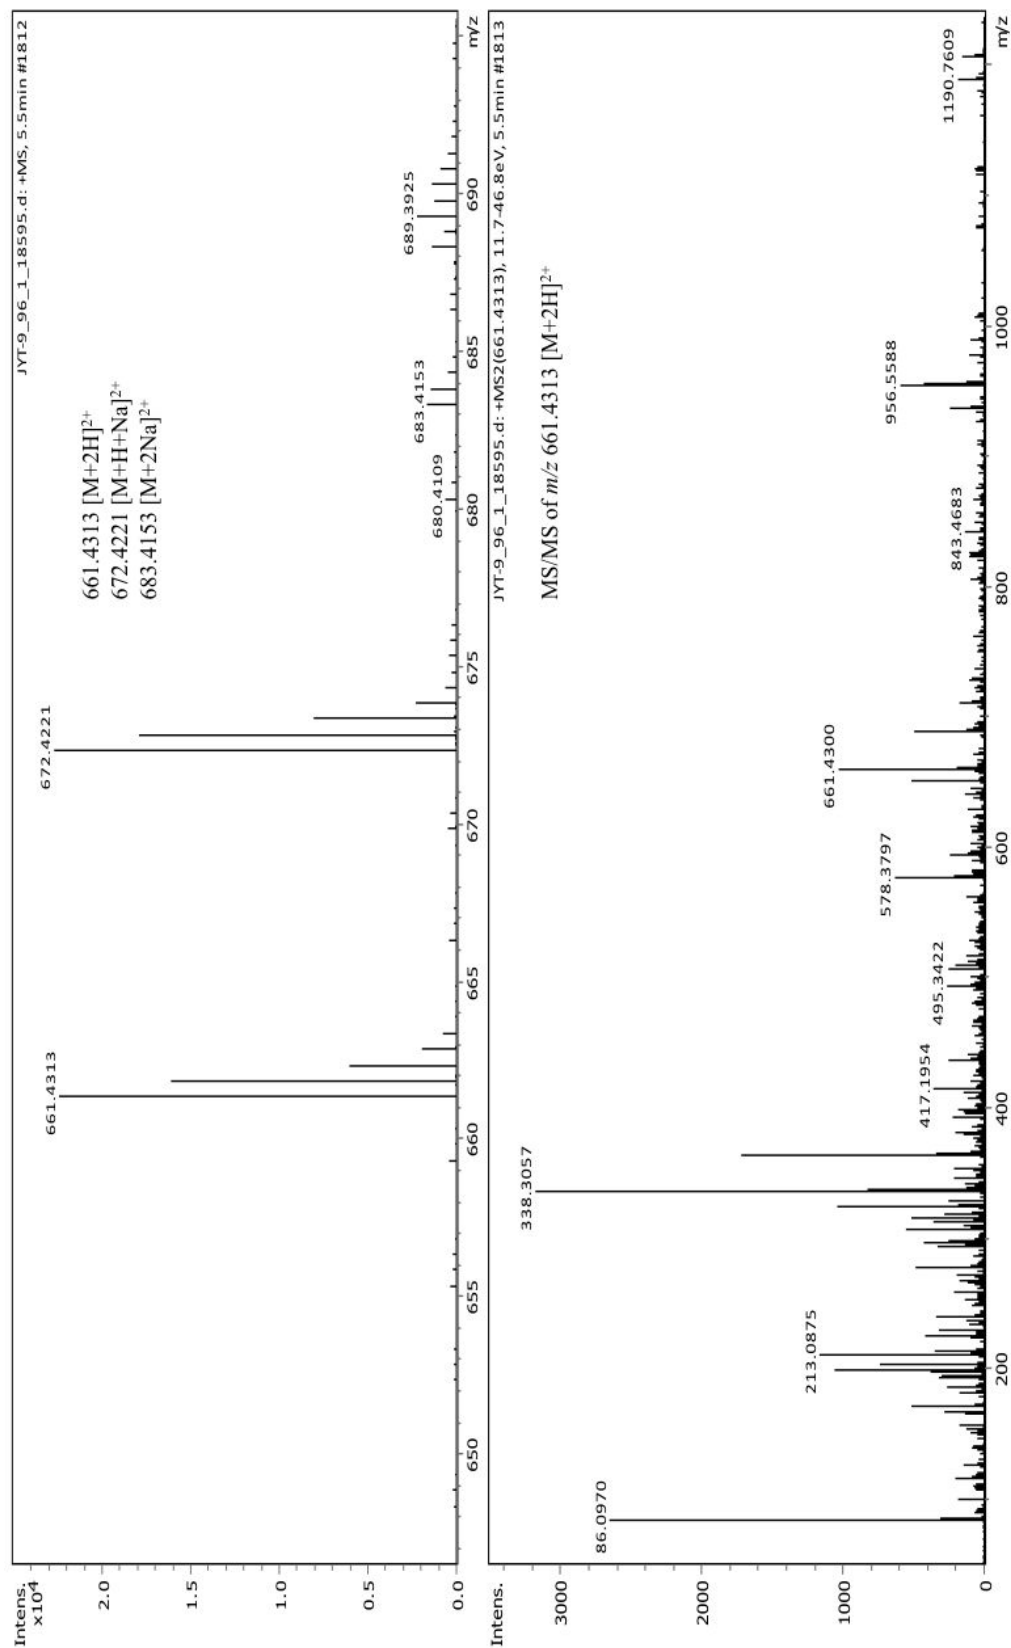





Figure S12. COSY (600 MHz, d<sub>3</sub>-MeOH) spectrum of **1**.

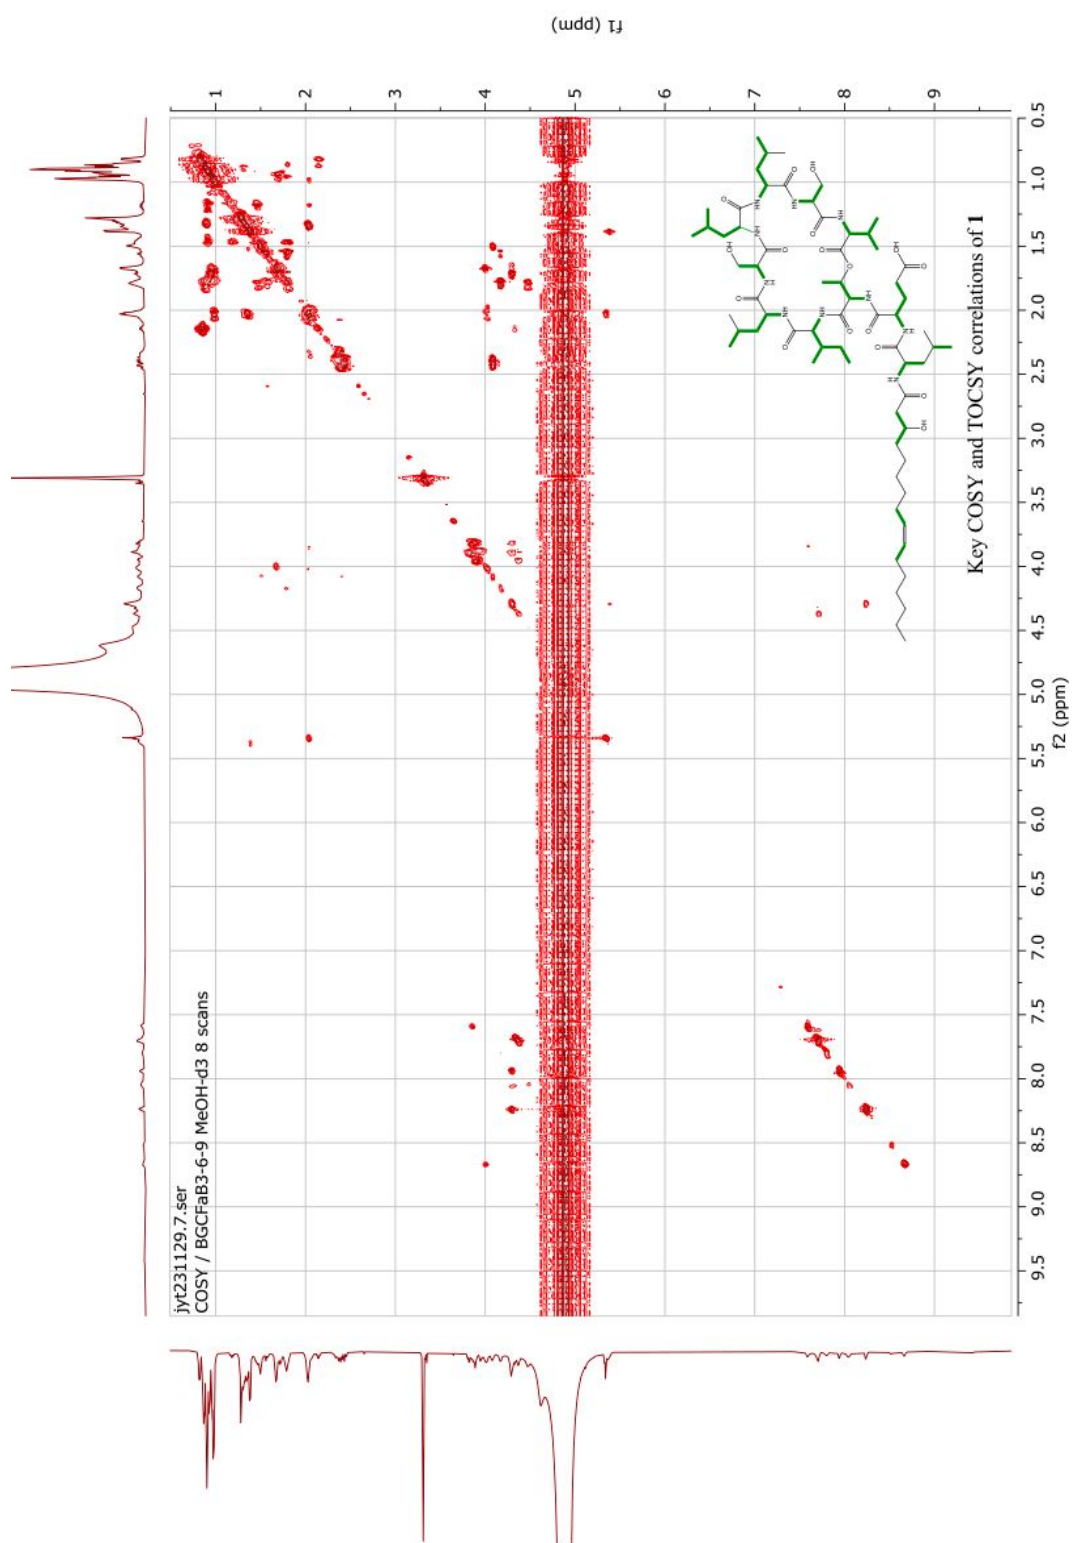

Figure S13. TOCSY (600 MHz, d<sub>3</sub>-MeOH) spectrum of **1**.

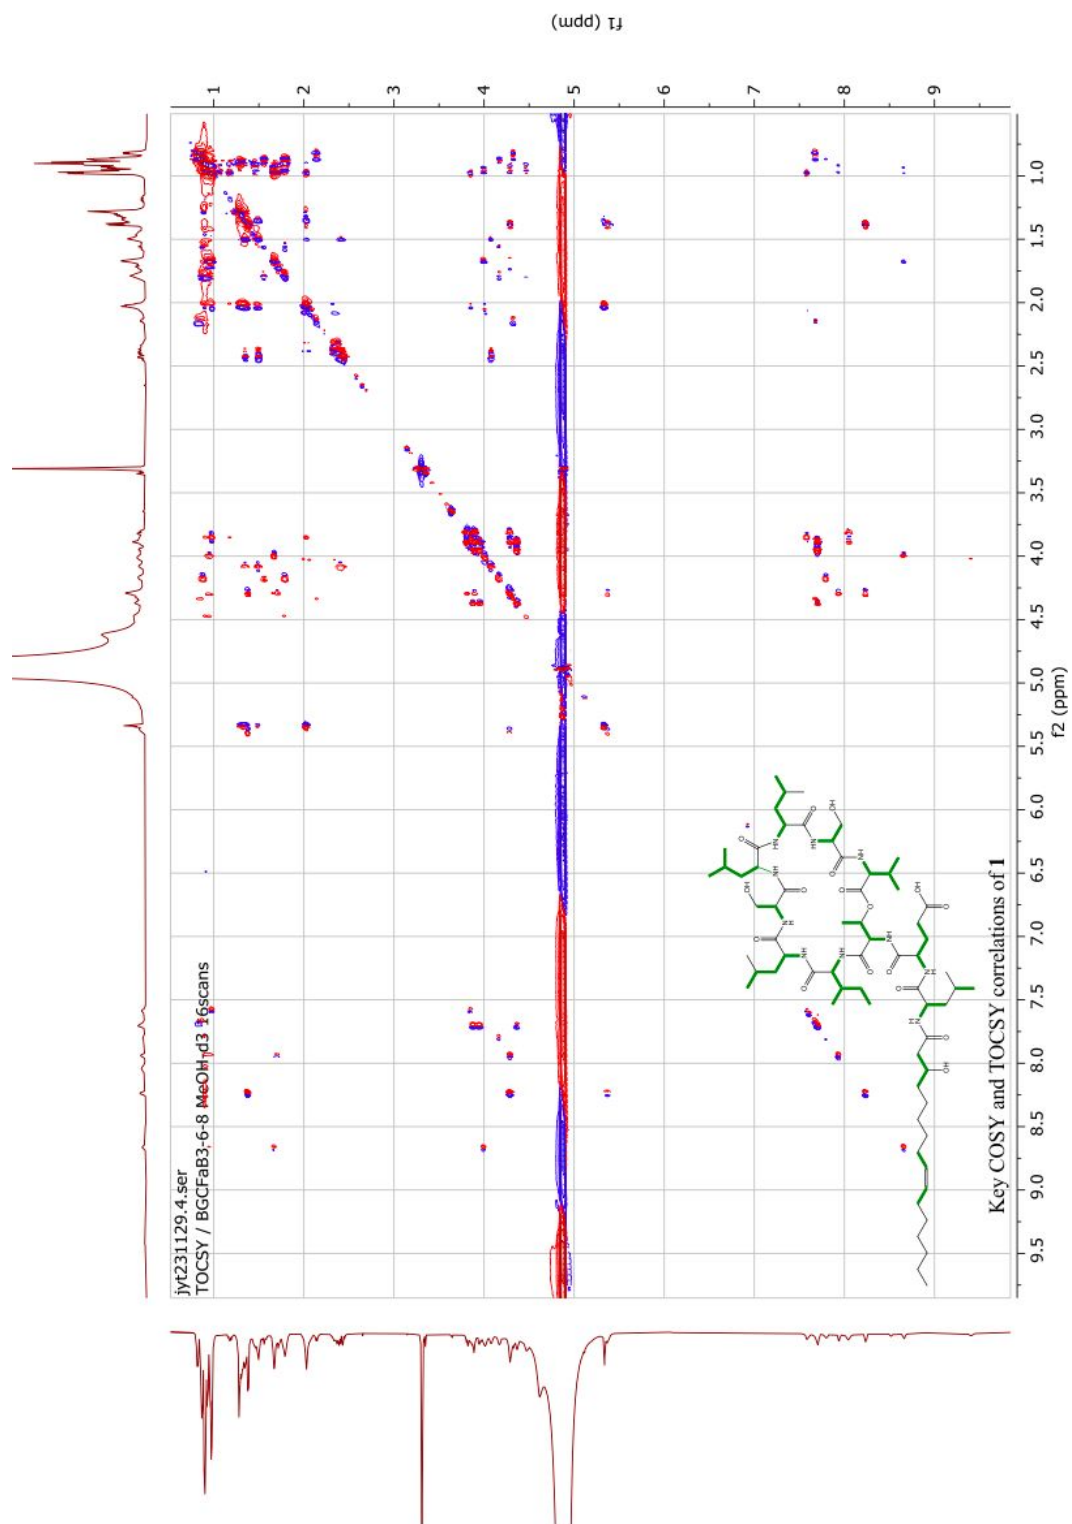





Figure S15. HMBC (600 MHz, d<sub>3</sub>-MeOH) spectrum of 1.

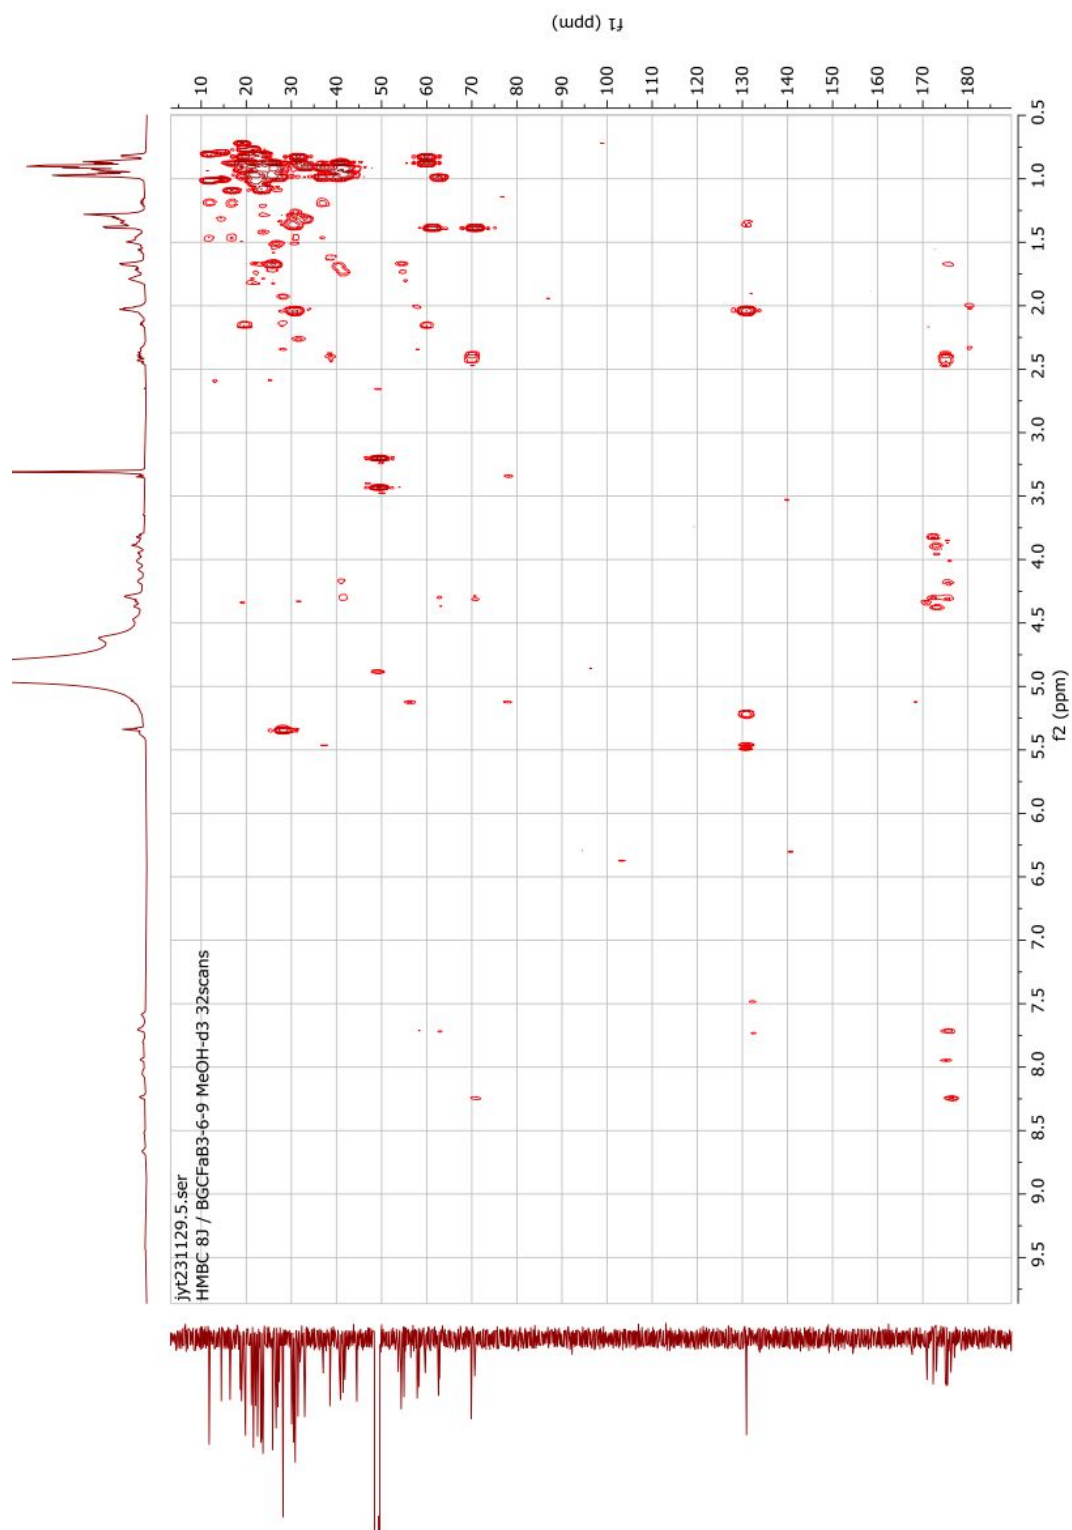

Figure S16. ROESY (600 MHz, d<sub>3</sub>-MeOH) spectrum of **1**.

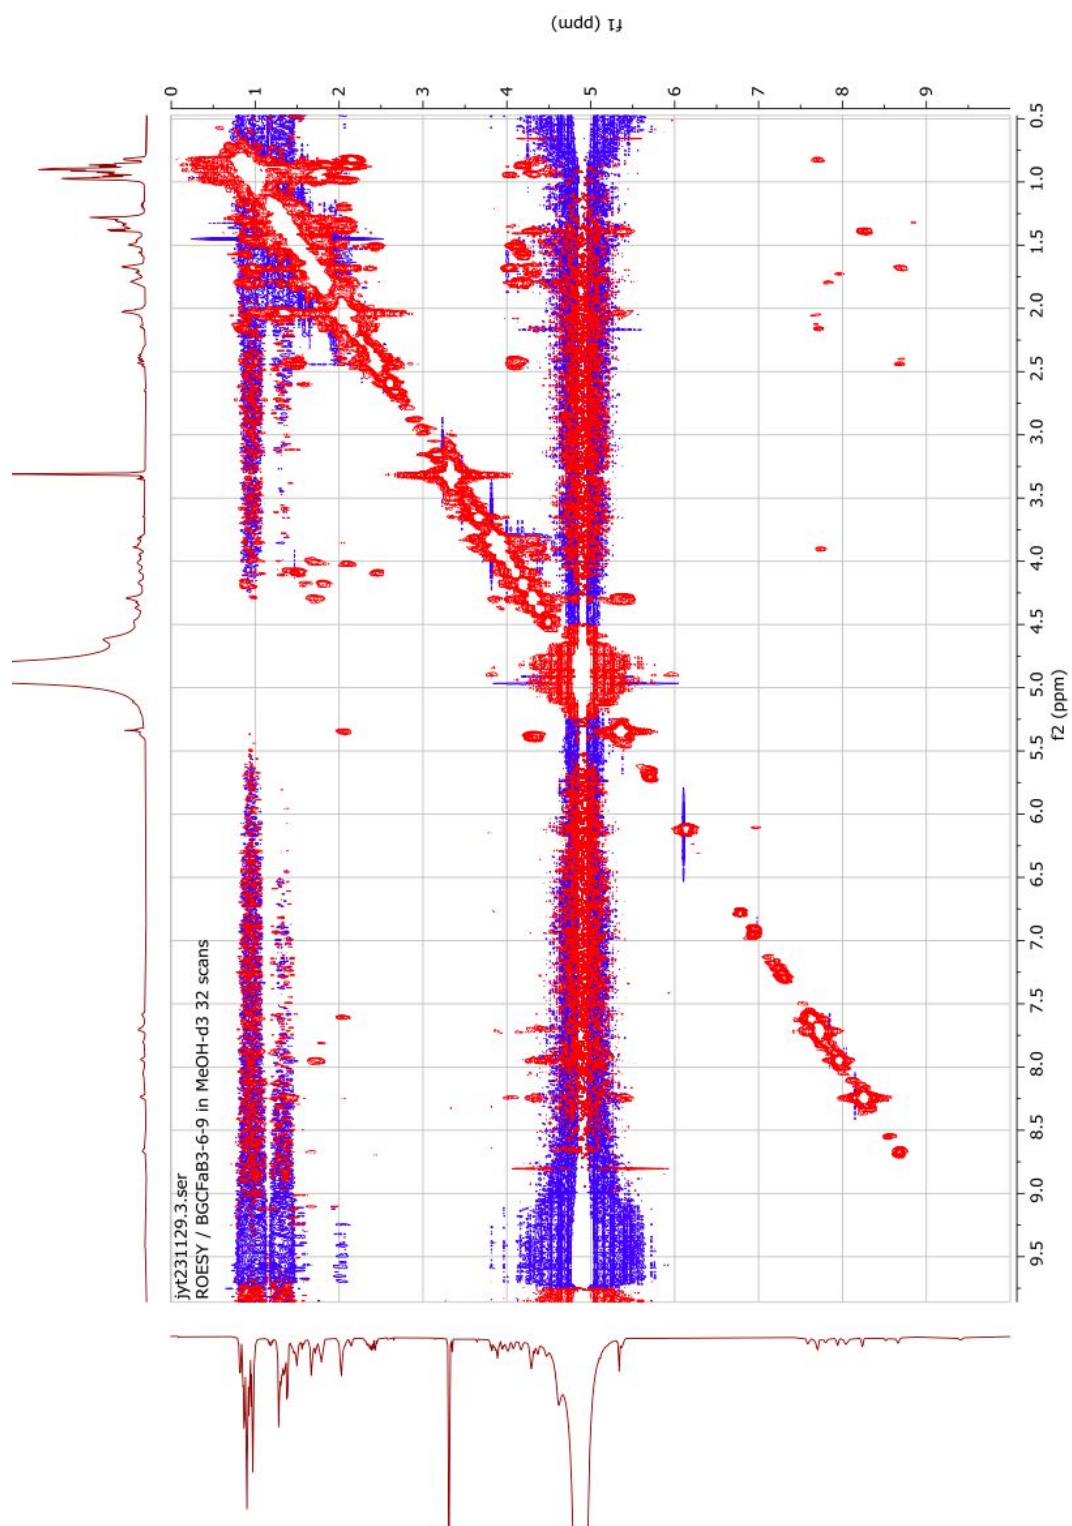

**Figure S17.** Whole genome phylogenetic analysis of isolate BGCFaB3. The whole genome phylogenetic tree was built with Type (Strain) Genome Server (TYGS) to identify the isolate BGCFaB3. *P. idahonensis* 1D357 is the closest strain to the isolate BGCFaB3 (highlighted in orange).

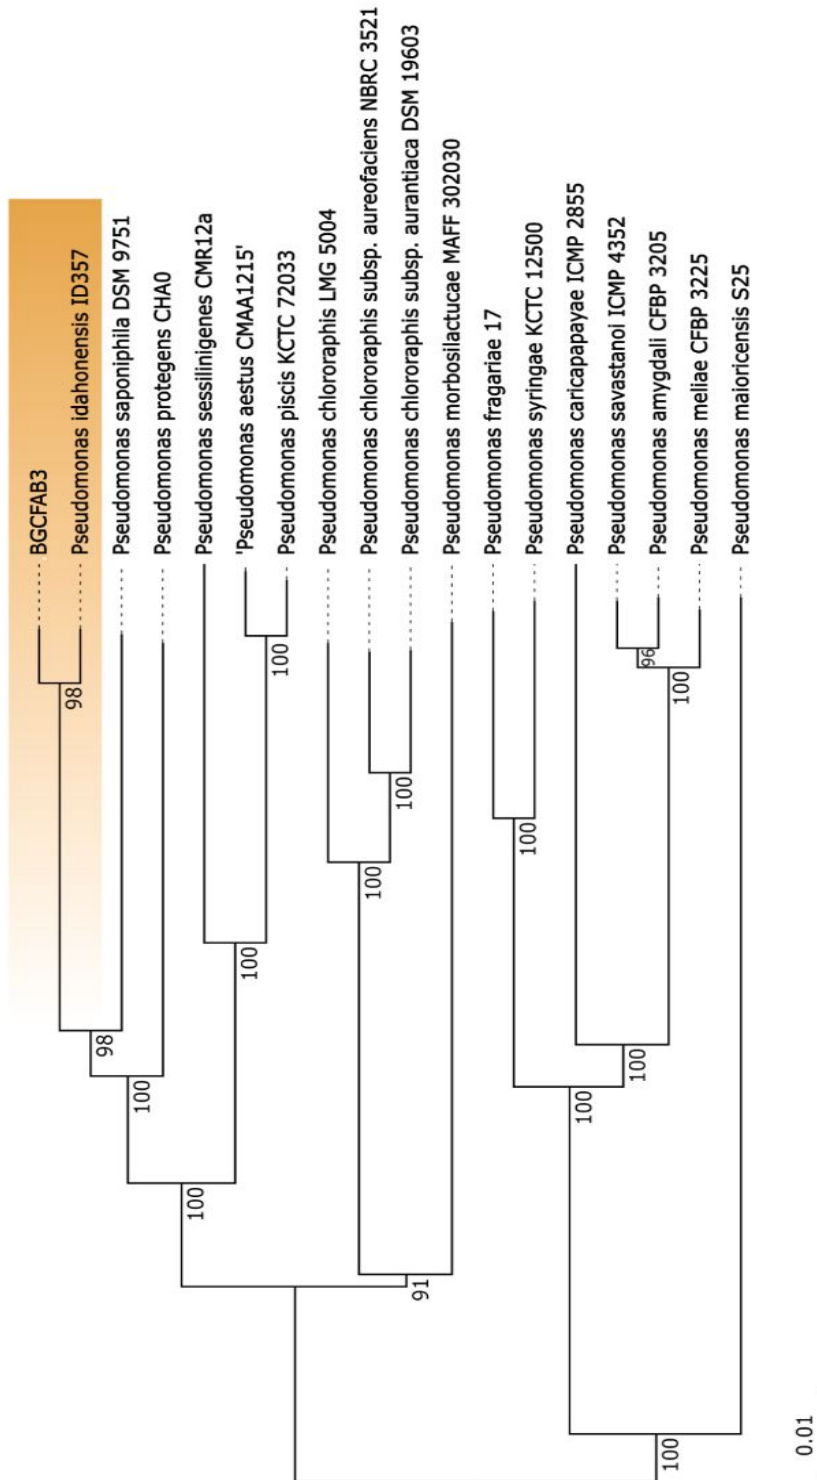

**Figure S18.** A phylogenetic analysis of the C-domains in the orfamide N biosynthetic gene cluster.

**Figure S18A.** A phylogenetic tree of the condensation (C) domains (amino acid level) of the *orf* biosynthetic gene clusters (BGC) in *P. idahonensis* BGCFaB3 (orfamide N-producing strain) and a comparison with that of *P. protegens* Pf-5 (orfamide A-producing strain). The AntiSMASH prediction of the condensation domains showed that the C-domain on module 1 (C1) encodes for a starting condensation domain, frequently capable of incorporating non-amino structures such as polyketides or lipid chains. Domains C8 and C9 were predicted as  $^1C_L$ , condensation domains forming the bond between two L-amino acids. The remaining C domains (C2, C3, C4, C5, C6, C7, and C10) were predicted as  $C_{DUAL}$ , which are dual epimerization/condensation domains capable of catalyzing epimerization of the amino acid incorporated in the previous module into a D-amino acid. These three different types of C-domains fall into distinct clades and are clustered together.

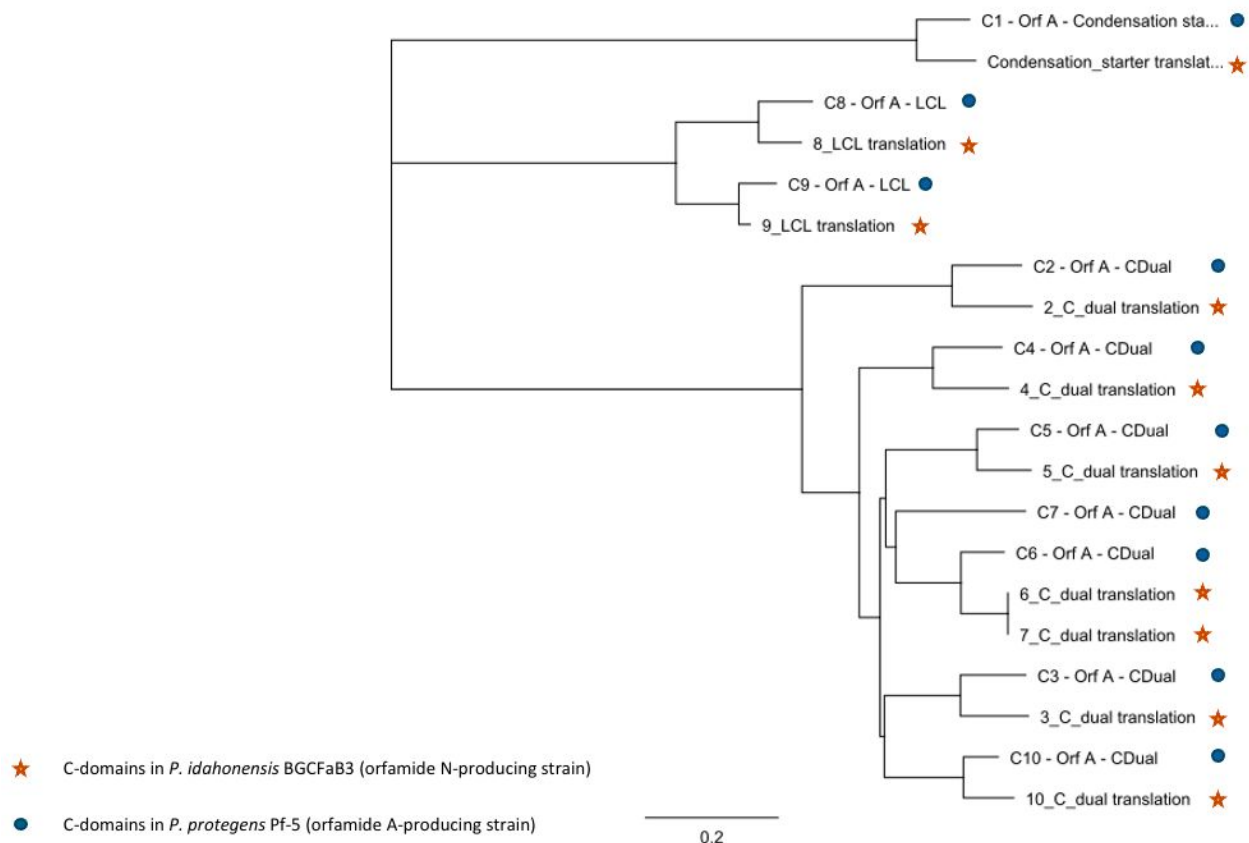

**Figure S18B.** Amino acid sequence alignment of C<sub>DUAL</sub> domains in *P. idahonensis* BGCFaB3 (orfamide N-producing strain) and *P. protegens* Pf-5 (orfamide A-producing strain), highlighting the conserved HHLxxxGD motif at the N-terminus which is characteristic of C<sub>DUAL</sub> domains<sup>1</sup>. To resolve the position of the single D-leucine in orfamide N, the amino acid sequence of the condensation domains for all C<sub>DUAL</sub> were aligned. The C-domain from module 2 presents two mutations in the catalytic regions essential for C<sub>DUAL</sub> activity, suggesting the domain is incapable of performing the epimerization of the leucine incorporated by module 1. On the other hand, this region was fully conserved for C-6 and consistent with published analogs, suggesting the epimerization of L-Leu to D-Leu at module 5.

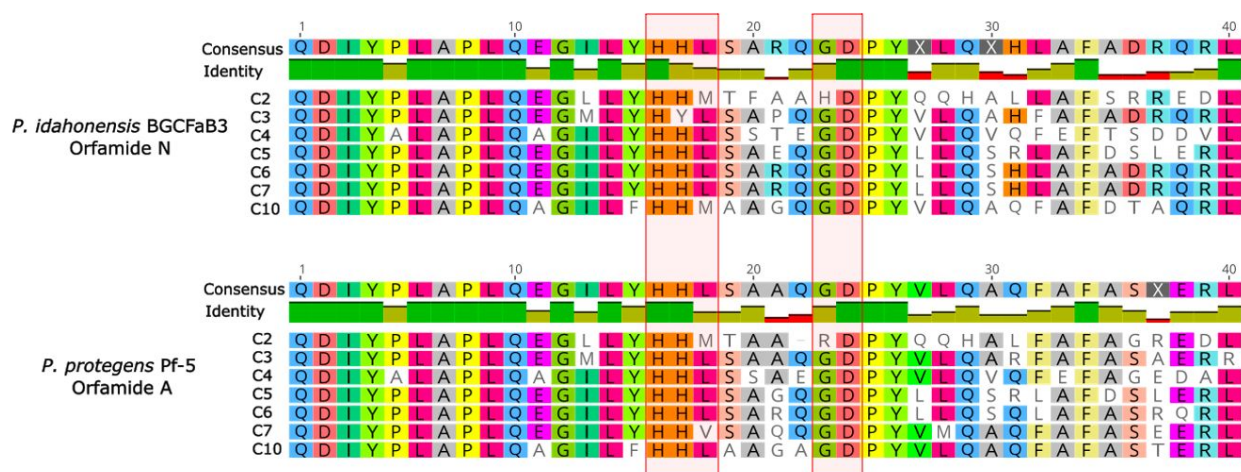

#### Reference:

(1) C.J. Balibar, F.H. Vaillancourt, C.T. Walsh, Generation of D amino acid residues in assembly of arthrofactin by dual condensation/epimerization domains. *Chem Biol.* **12**, 1189-200 (2005).

**Figure S19.** Chiral HPLC analysis of isoleucine residues.

**Figure S19A.** Chiral HPLC analysis of the underivatized hydrolysate of **1** was performed using a Phenomenex Chirex 3126 D-penicillamine column (4.6 x 250 mm) with an isocratic flow of 1 mM copper (II) sulfate in water/isopropanol (95:5) at 1 mL/min. The retention time of the Ile residue in orfamide N (**1**) was compared to that of D- and D-*allo*-Ile standards. Retention times were measured by HPLC at 254 nm. Identifications were confirmed by co-injection with standards (Fig. S19B).

|     | Retention time (min) |                | Measured | Assignment     |
|-----|----------------------|----------------|----------|----------------|
|     | D                    | D- <i>allo</i> |          |                |
| Ile | 56.4                 | 45.9           | 46.2     | D- <i>allo</i> |

**Figure S19B.** Chromatogram for (a) D- and D-*allo*-Ile standards (b) the underivatized hydrolysate of **1** (c) co-injection with D-*allo*-Ile standard.

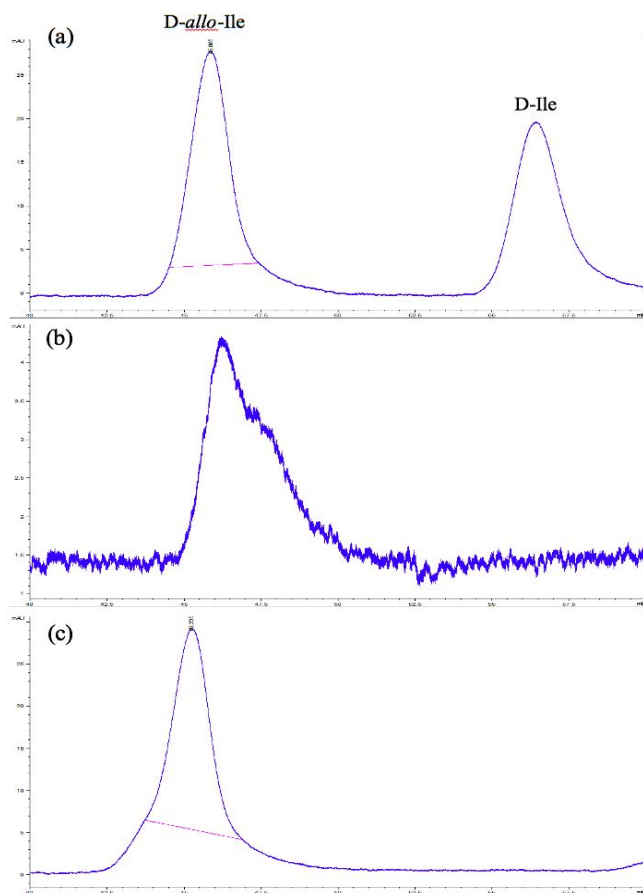



**Figure S20.** Advanced Marfey's analysis of orfamide N (1).

**Figure S20A.** The retention times of derivatized amino acids in orfamide N were compared to that of derivatized amino acid standards. Retention times were measured by UPLC-DAD-ESIMS extracted ion chromatograms.

| Amino acid       | Retention time (min) |      |            | Assignment                       |
|------------------|----------------------|------|------------|----------------------------------|
|                  | L                    | D    | Measured   |                                  |
| Ser              | 0.68                 | 0.72 | 0.72       | D                                |
| Glu              | 0.86                 | 1.03 | 1.03       | D                                |
| Leu              | 4.15                 | 5.81 | 4.16, 5.81 | 3 L and 1 D <sup>a</sup>         |
| Val              | 2.68                 | 4.2  | 2.67       | L                                |
| Thr              | 0.78                 | 1.18 | 0.94       | D- <i>allo</i> -Thr              |
| <i>allo</i> -Thr | 0.78                 | 0.93 |            |                                  |
| Ile              | 3.91                 | 5.64 | 5.66       | D- <i>allo</i> -Ile <sup>b</sup> |
| <i>allo</i> -Ile | 3.93                 | 5.65 |            |                                  |

<sup>a</sup>The ratio of L-leucines to D-leucines was determined by the area under the curve of 2317.187 to 749.299 (Fig. S20C).

<sup>b</sup>Marfey's analysis results were unable to differentiate between D- and D-*allo*-Ile. To resolve the configuration of the remaining Ile residue, the underivatized hydrolysate of **1** was subjected to chiral HPLC analysis, which showed it to be of D-*allo* configuration (Fig. S19).

**Figure S20B.** Extracted ion chromatogram (EIC  $m/z$  370.13) for (a) orfamide N derivatized hydrolysate (b) FDAA-L-valine (c) FDAA-D-valine.

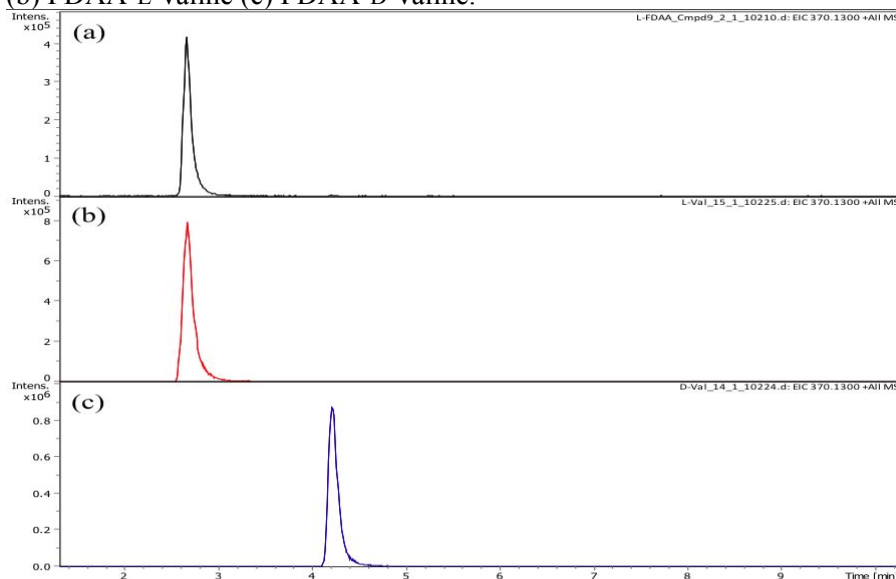



**Figure S20C.** Extracted ion chromatogram (EIC  $m/z$  384.15) for (a) orfamide N derivatized hydrosylate (b) FDAA-L-leucine (c) FDAA-D-leucine (d) FDAA-L-isoleucine (e) FDAA-L-*allo*-isoleucine (f) FDAA-D-isoleucine (g) FDAA-D-*allo*-isoleucine.

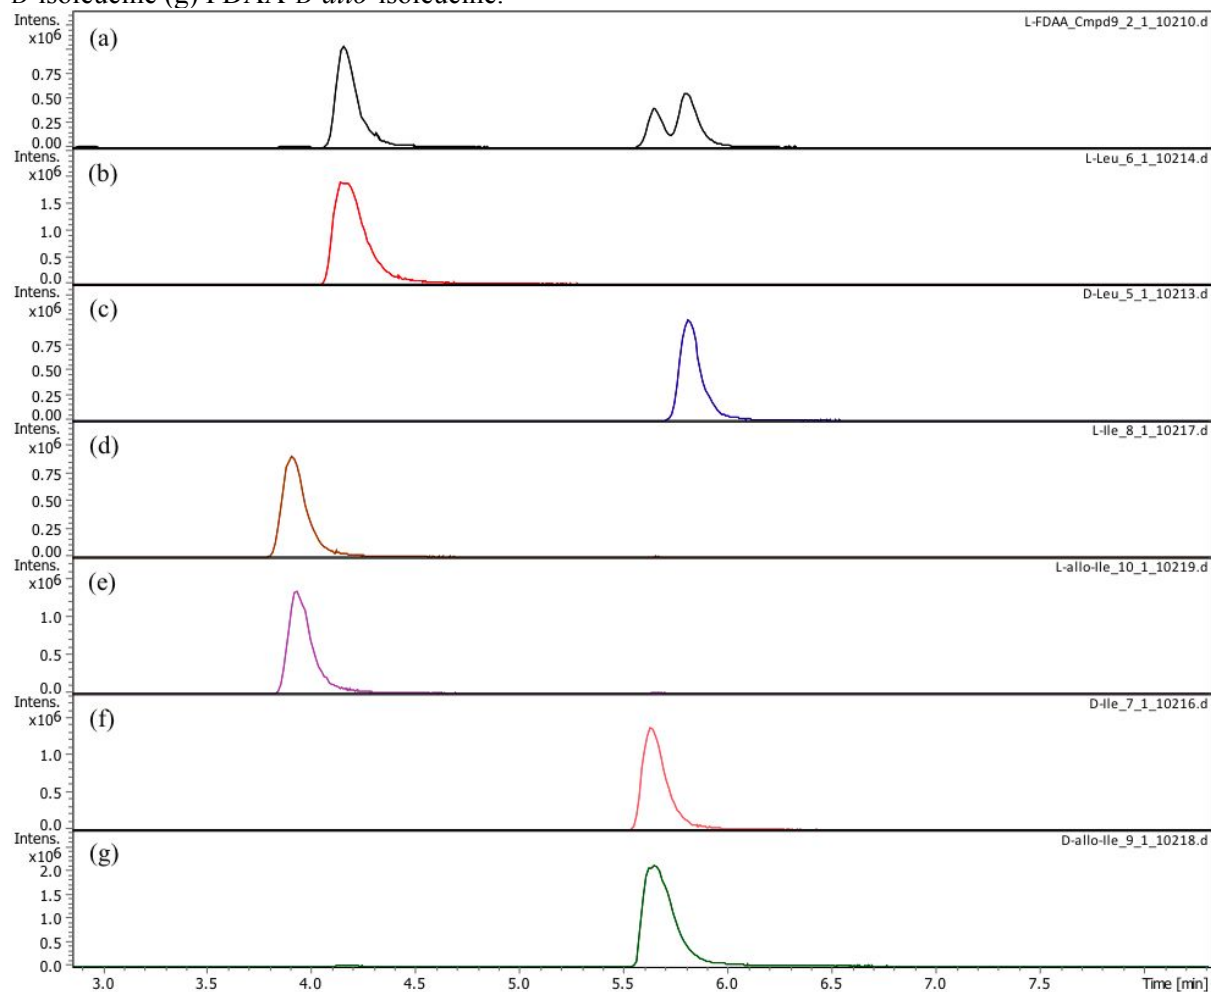

**Figure S20D.** Extracted ion chromatogram (EIC  $m/z$  358.10) for (a) orfamide N derivatized hydrosylate (b) FDAA-L-serine (c) FDAA-D-serine.

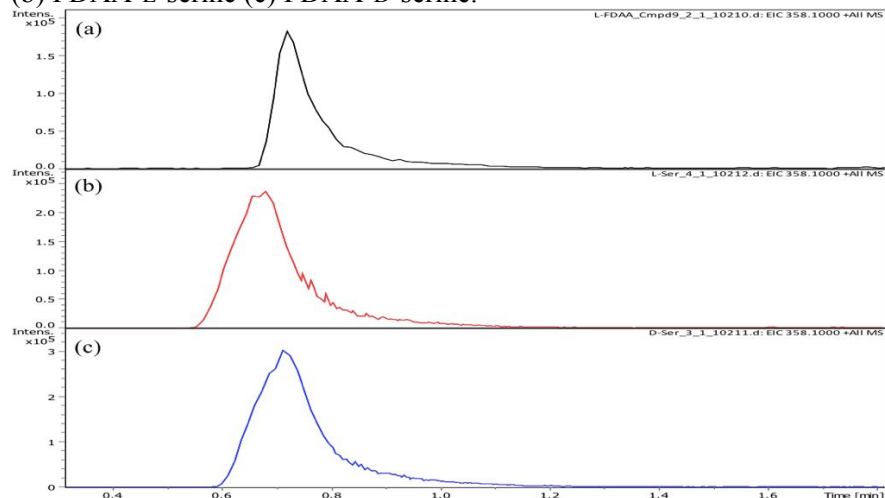

**Figure S20E.** Extracted ion chromatogram (EIC  $m/z$  400.11) for (a) orfamide N derivatized hydrosylate (b) FDAA-L-glutamic acid (c) FDAA-D-glutamic acid.

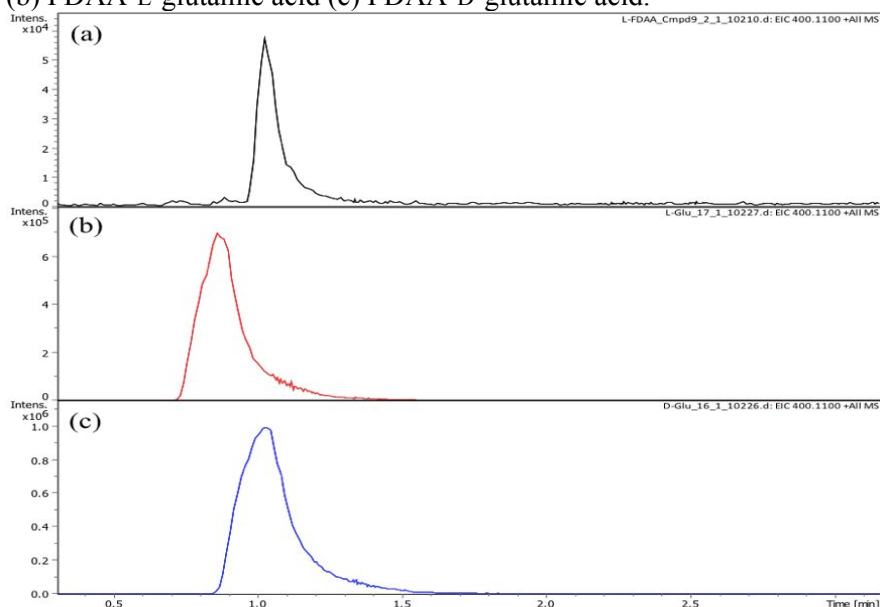

**Figure S20F.** Extracted ion chromatogram (EIC  $m/z$  372.11) for (a) orfamide N derivatized hydrosylate (b) FDAA-L-threonine (c) FDAA-L-*allo*-threonine (d) FDAA-D-threonine (e) FDAA-D-*allo*-threonine.

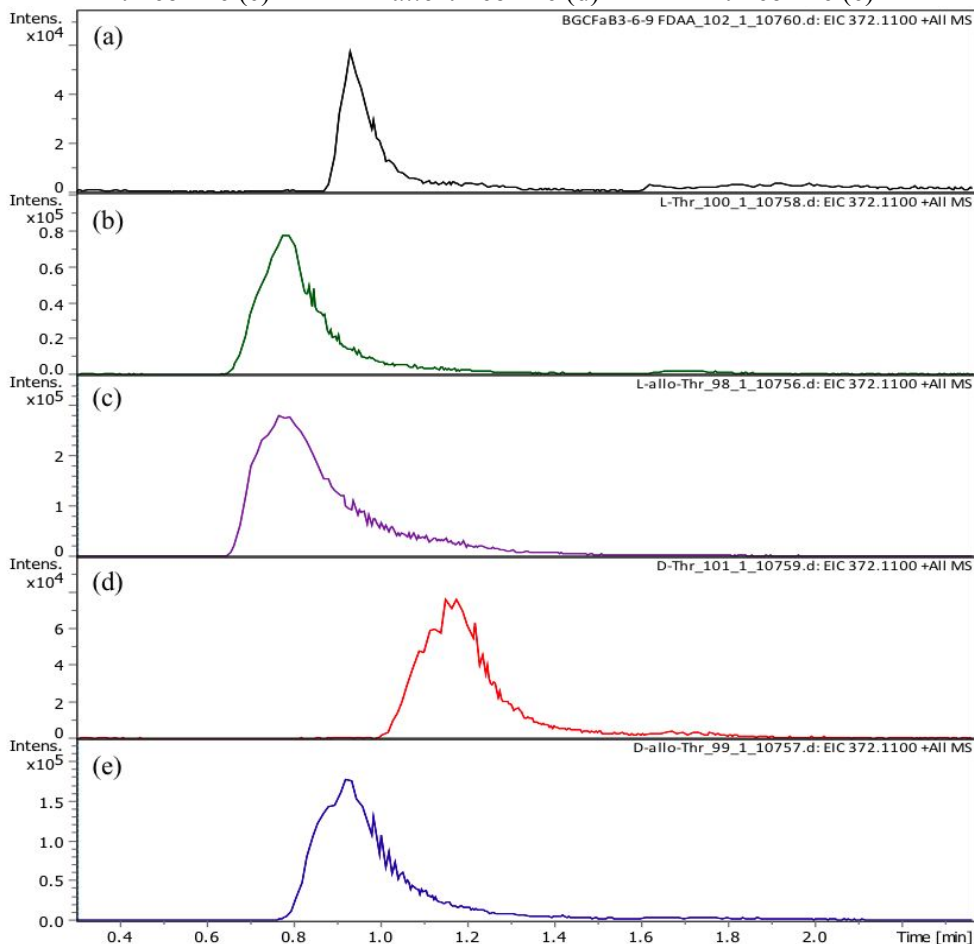

**Figure S21. Chiral LC-MS analysis to determine the configuration of the  $\beta$ -hydroxy acid in **1**.**

**Figure S21A.** The retention time of 3-OH-hexadecanoic acid synthesized from the free 3-OH-hexadec-9-enoic acid isolated from orfamide N (**1**) was compared to a 3*R/S*-OH-hexadecanoic acid standard. Retention times were measured by UPLC-DAD-ESIMS extracted ion chromatograms at  $m/z$  271.2544.

|                        | Retention time (min) |          | Measured | Assignment |
|------------------------|----------------------|----------|----------|------------|
|                        | <i>S</i>             | <i>R</i> |          |            |
| 3-OH-hexadecanoic acid | 17.8                 | 18.4     | 18.3     | <i>R</i>   |

**Figure S21B.** UPLC-DAD-ESIMS extracted ion chromatogram at  $m/z$  271.544 for (a) 3*R/S*-OH-hexadecanoic acid standard (b) 3*R*-OH-hexadecanoic acid synthesized from the free 3*R*-OH-hexadec-9-enoic acid isolated from orfamide N (**1**).

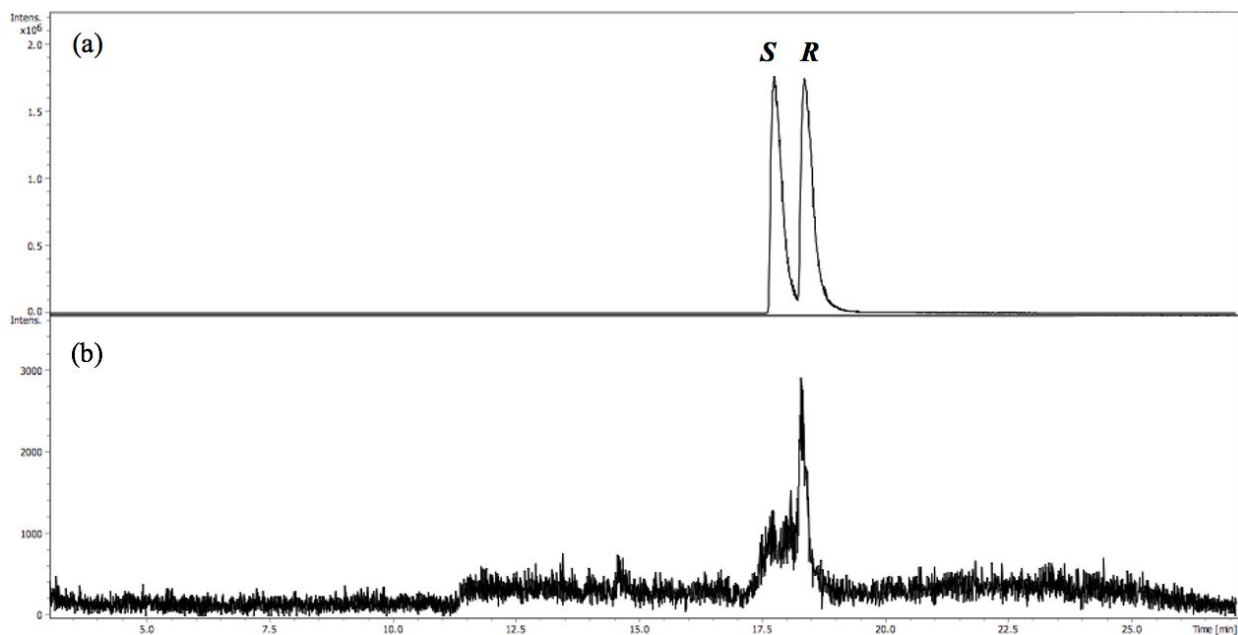

**Figure S22.** Results of antibacterial assay. Known CFU/mL of bacteria [*Enterobacter aerogenes* (ATCC 13048), *Enterococcus faecium* (ATCC 35667), *Staphylococcus aureus* (ATCC 29213), and *Escherichia coli* (ATCC 25922)] and yeast [*Candida albicans* (ATCC 18804)] were diluted in Mueller Hinton II Broth (Cation- Adjusted) (CAMH) and Sabouraud Dextrose Broth (SDB) respectively to achieve final inoculum density of  $2 \times 10^5$  CFU/mL. 100 microliters of diluted cell cultures were added per well containing equal volumes of the same media with the test compound and were incubated overnight at 37 °C. Optical density was measured at 570 nm. Moxifloxacin and doxycycline were used as bacterial positive controls, while amphotericin B was used for *C. albicans*. MICs were determined as described by the European Committee on Antimicrobial Susceptibility Testing (EU-CAST).

| Compound ID           | MIC (mg/mL)                               |                                            |                                          |                                      |                                      |
|-----------------------|-------------------------------------------|--------------------------------------------|------------------------------------------|--------------------------------------|--------------------------------------|
|                       | <i>Staphylococcus aureus</i> (ATCC 29213) | <i>Enterobacter aerogenes</i> (ATCC 13048) | <i>Enterococcus faecium</i> (ATCC 35667) | <i>Escherichia coli</i> (ATCC 25922) | <i>Candida albicans</i> (ATCC 18804) |
| <b>Orfamide N (1)</b> | >100                                      | >100                                       | >100                                     | >100                                 | >100                                 |
| <b>Standard drugs</b> | MIC (mg/mL)                               |                                            |                                          |                                      |                                      |
| Moxifloxacin          | <0.195                                    | <0.195                                     | 1.56                                     | <0.195                               |                                      |
| Doxycycline           | <0.195                                    | 2.84                                       | <0.195                                   | 0.48                                 |                                      |
| Amphotericin B        |                                           |                                            |                                          |                                      | <0.195                               |

**Reference:**

(1) European Committee on Antimicrobial Susceptibility Testing (EUCAST), 2022, [https://www.eucast.org/ast\\_of\\_bacteria/mic\\_determination](https://www.eucast.org/ast_of_bacteria/mic_determination).
